# Supplementary material for: Identification of cell surface markers and establishment of monolayer differentiation to retinal pigment epithelial cells
Source: PubMed Central journal article supplement (PMC7105463; doi:10.1038/s41467-020-15326-5), 2020-03-30
Supplement: 41467_2020_15326_MOESM4_ESM.pdf [file 41467_2020_15326_MOESM4_ESM.pdf]

**Title:** SUPPLEMENTARY DATA 1.

**Description:** Summary of results for the surface protein screen, related to Figures 1A and 1B.

**Title:** SUPPLEMENTARY DATA 2.

**Description:** List and supporting information of the primary and secondary antibodies used in the study, related to Experimental Procedures.
